# Supplementary material
Source: Research Square preprint supplement (doi:10.21203/rs.3.rs-8665668/v1)
Supplement: Supplementary file 1 [file 498e186859b1f5b0502f945c.docx]

Supplementary Table S2. Formulas and thresholds of ROR, PRR, BCPNN, and MGPS methods.

| Method | Formula | Threshold |
| --- | --- | --- |
| ROR |  | a ≥ 3  ROR ≥ 3  95%CI (lower limit) > 1 |
|  |
|  |
| PRR |  | a ≥ 3  PRR ≥ 2  95%CI (lower limit) > 1 |
|  |
|  |
| BCPNN |  | IC025>0 |
|  |
|  |
|  |
|  |
| MGPS |  | EBGM05>2 |
|  |
|  |

ROR, reporting odds ratio; CI, confidence interval; PRR, proportional reporting ratios; BCPNN, Bayesian confidence propagation neural network; IC, information component; SD, standard deviation; MGPS, multi-item gamma poisson shrinker; EBGM, empirical Bayesian geometric mean.
