# Supplementary material
Source: Research Square preprint supplement (doi:10.21203/rs.3.rs-8665668/v1)
Supplement: Supplementary file 2 [file 556eb6ce47c3b4e908a0f5c7.docx]

| **ID** | **GO:0016338** | **GO:0045216** | **GO:0010810** | **GO:0007194** | **GO:0031280** | **GO:0007229** | **GO:0061041** | **GO:0031589** |
| --- | --- | --- | --- | --- | --- | --- | --- | --- |
| **Description** | calcium-independent cell-cell adhesion via plasma membrane cell-adhesion molecules | cell-cell junction organization | regulation of cell-substrate adhesion | negative regulation of adenylate cyclase activity | negative regulation of cyclase activity | integrin-mediated signaling pathway | regulation of wound healing | cell-substrate adhesion |
| **setSize** | 17 | 175 | 187 | 17 | 17 | 95 | 118 | 299 |
| **enrichmentScore** | -0.799572228 | -0.404422975 | -0.391850761 | 0.807004254 | 0.807004254 | -0.464284255 | -0.429791644 | -0.325928244 |
| **NES** | -2.131419595 | -1.738744347 | -1.710714273 | 1.923812567 | 1.923812567 | -1.819019744 | -1.760318507 | -1.479516391 |
| **pvalue** | 6.29E-06 | 1.23E-05 | 1.80E-05 | 6.30E-05 | 6.30E-05 | 6.48E-05 | 6.35E-05 | 6.49E-05 |
| **p.adjust** | 0.034679295 | 0.034679295 | 0.034679295 | 0.046797654 | 0.046797654 | 0.046797654 | 0.046797654 | 0.046797654 |
| **qvalue** | 0.032424567 | 0.032424567 | 0.032424567 | 0.043755032 | 0.043755032 | 0.043755032 | 0.043755032 | 0.043755032 |
| **rank** | 291 | 1389 | 2267 | 329 | 329 | 1422 | 1541 | 2326 |
| **core_enrichment** | CX3CL1/BMP2/CLDN1/CLDN11 | RDX/EXT1/TBCD/ADD1/SVEP1/IKBKB/VEGFA/CDH13/TLN1/AGT/RHOC/TJP1/MYO1C/ADAM10/ACTB/PKP4/VCL/FSCN1/CDH10/SLC39A9/APC/WDR1/F2R/PRKCA/PAK2/SRF/FLNA/IL1B/EPHA2/SMAD3/F2RL1/CLDN1/NF2/TGFB2/CLDN11/CDH6 | ARHGEF7/DUSP3/ITGB3/ITGA5/SEMA3E/SRC/TSC1/C1QBP/PKP2/RAC2/NF1/ST6GAL1/FBLN1/TRIOBP/CRK/RSU1/PIK3CB/CEACAM6/COL1A1/MMP14/TEK/COL16A1/TBCD/MINK1/VEGFA/RASA1/PTPRA/JAG1/ILK/ITGA6/CDH13/TLN1/BCL2/APOD/DLC1/SPRY4/DMP1/ARHGAP6/SLC9A1/DAG1/CORO1C/VCL/GREM1/ATXN3/GBP1/EMILIN1/UTRN/NRP1/POSTN/FLNA/MACF1/CX3CL1/NEDD9/SERPINE1/PTK2/CORO2B/CSF1/ABI3BP/SMAD3/NF2/FZD7/FN1/THBS1/HAS2/FERMT1 | EDNRB/GABBR2/PALM | EDNRB/GABBR2/PALM | COL16A1/CD47/ADAMTS1/PTPRA/ZNF304/ILK/ITGA6/TLN1/ADAM10/ITGA1/PTN/ITGAL/NRP1/ZYX/FLNA/ITGB5/MYH9/NEDD9/PTK2/ITGA4/ITGA2/PTPN11/FN1/FERMT1 | TSPAN8/TMEM97/PDGFA/MTOR/FGF2/F7/ANXA1/PRKG1/PLAUR/EMILIN1/SH2B3/F2R/SERPINE1/PTK2/TNFRSF12A/PLAT/SMAD3/F2RL1/CLDN1/THBS1/FERMT1/EDN1/HBEGF/SERPINB2 | ARPC2/LAMB1/EPHB3/ARHGEF7/DUSP3/ITGB3/ITGA5/SEMA3E/KIF14/ANXA2/SRC/TSC1/BCR/C1QBP/LYVE1/PKP2/RAC2/NF1/ST6GAL1/FBLN1/TRIOBP/CRK/L1CAM/RSU1/PIK3CB/PPARD/CEACAM6/COL1A1/MMP14/TEK/COL16A1/TBCD/MINK1/TRIP6/SVEP1/VEGFA/RASA1/PTPRA/JAG1/ILK/ITGA6/CDH13/TLN1/BCL2/APOD/DLC1/SPRY4/DMP1/ARHGAP6/SORBS1/SLC9A1/DAG1/CORO1C/TYRO3/VCL/CD44/GREM1/ADAMTS12/ATXN3/GBP1/EMILIN1/ITGA1/ITGAL/ACTN1/PARVB/SNED1/UTRN/NRP1/POSTN/SRF/ZYX/FLNA/MACF1/CX3CL1/ITGB5/NEDD9/SERPINE1/PTK2/ITGA4/ITGA2/PXN/CORO2B/CSF1/SORBS3/ABI3BP/SMAD3/NF2/FZD7/FN1/THBS1/COL13A1/HAS2/FERMT1 |

GEO database analysis results (GSE59671, GSEA analysis)

GEO database analysis results (GSE137534, GSEA analysis)

| **ID** | **GO:0006793** | **GO:0006796** | **GO:0016043** | **GO:0071840** |
| --- | --- | --- | --- | --- |
| **Description** | phosphorus metabolic process | phosphate-containing compound metabolic process | cellular component organization | cellular component organization or biogenesis |
| **setSize** | 10 | 10 | 10 | 10 |
| **enrichmentScore** | -0.74632 | -0.74632 | -0.72046 | -0.72046 |
| **NES** | -1.80476 | -1.80476 | -1.74221 | -1.74221 |
| **pvalue** | 0.001832 | 0.001832 | 0.003889 | 0.003889 |
| **p.adjust** | 0.042145 | 0.042145 | 0.044728 | 0.044728 |
| **qvalue** | 0.026039 | 0.026039 | 0.027635 | 0.027635 |
| **rank** | 86 | 86 | 2512 | 2512 |
| **leading_edge** | tags=60%, list=0%, signal=60% | tags=60%, list=0%, signal=60% | tags=20%, list=10%, signal=18% | tags=20%, list=10%, signal=18% |
| **core_enrichment** | F2/ND5/ND1/ND4L/ND3/C3 | F2/ND5/ND1/ND4L/ND3/C3 | C2/C3 | C2/C3 |
