# Supplementary material
Source: Research Square preprint supplement (doi:10.21203/rs.3.rs-8665668/v1)
Supplement: Supplementary file 3 [file 98227a88e1825d5c6bdcaa12.docx]

**Supplementary table S3: qPCR primer list.**

| Primer name | Primer sequence (5'-3') |
| --- | --- |
| H-GAPDH-S | GGAAGCTTGTCATCAATGGAAATC |
| H-GAPDH-A | TGATGACCCTTTTGGCTCCC |
| H-PDE4B-S | CCAGGTTGGTTTCATCGACTACA |
| H-PDE4B-A | TGGTGGTGAGGGACTTTGAGGT |
| H-NPR3-S | GTTTGTTGAAGGATTCCACGATG |
| H-NPR3-A | GGCGATACCTTCAAATGTTCTGT |
| H-CRISPLD2-S | ACAACGAGTCTCACTCCCGG |
| H-CRISPLD2-A | GTGCTCCCAGATGCACTGAC |
| H-ADCY3-S | GGTGGAGAAGGAGAAGCAGAGT |
| H-ADCY3-A | ATGGTCAGGATGAGGAGCAGAAT |
| H-KNN4-S | GGCAGGAACTGGCATTGGA |
| H-KNN4-A | GAGGCAGAGGAGTAAGAAGGTGG |

S: sense primer; A: antisense primer; H: human
