# Supplementary material
Source: Research Square preprint supplement (doi:10.21203/rs.3.rs-8665668/v1)
Supplement: Supplementary file 4 [file a8c212ae54c350210d4f39d7.docx]

Supplementary Table S1. Structure of the 2×2 contingency table used for disproportionality analysis.

|  | Target adverse events | All other adverse events |
| --- | --- | --- |
| Target drug | a | b |
| All other drugs | c | d |

The table defines the four core components (a, b, c, d) that form the basis for all disproportionality calculations. A safety signal is detected when the association between the target drug and the target adverse event (cell a) is disproportionately strong compared to the background reporting of all other drugs and events.
